# Supplementary material
Source: PubMed Central journal article supplement (PMC9625103)
Supplement: CJN.01890222SupplementaryData.pdf [file CJN.01890222SupplementaryData.pdf]

## **Supplemental Material**

Supplemental Table 1: Search Strategy

Supplemental Table 2: Studies of transgender men on GAHT and creatinine at baseline and follow-up (n=18 studies)

Supplemental Table 3: Studies of transgender women on GAHT and creatinine at baseline and follow-up (n=23 studies)

Supplemental Figure 1: Quality assessment

Supplemental Table 4: Characteristics of creatinine assays of studies included in meta-analysis

## Supplemental Table 1: Search Strategy

### Medline

|                                                                                                                                                                                                                                                                                                                                                                                                                                                                                                                                                                                                                                                                                                                                                                                                                                                                                                                                                                                                                                                                                                                                                                                                                                                                                                                                                                                                                                                                                                                                                  |         |
|--------------------------------------------------------------------------------------------------------------------------------------------------------------------------------------------------------------------------------------------------------------------------------------------------------------------------------------------------------------------------------------------------------------------------------------------------------------------------------------------------------------------------------------------------------------------------------------------------------------------------------------------------------------------------------------------------------------------------------------------------------------------------------------------------------------------------------------------------------------------------------------------------------------------------------------------------------------------------------------------------------------------------------------------------------------------------------------------------------------------------------------------------------------------------------------------------------------------------------------------------------------------------------------------------------------------------------------------------------------------------------------------------------------------------------------------------------------------------------------------------------------------------------------------------|---------|
| gender dysphoria/ or transgender persons/ or "health services for transgender persons"/ or transsexualism/                                                                                                                                                                                                                                                                                                                                                                                                                                                                                                                                                                                                                                                                                                                                                                                                                                                                                                                                                                                                                                                                                                                                                                                                                                                                                                                                                                                                                                       | 6716    |
| ((gender* or sex*) adj2 (dysphori* or identity disorder*)).ti,ab,kf                                                                                                                                                                                                                                                                                                                                                                                                                                                                                                                                                                                                                                                                                                                                                                                                                                                                                                                                                                                                                                                                                                                                                                                                                                                                                                                                                                                                                                                                              | 1689    |
| (transgender* or transsexual* or transman or transmen or transwoman or transwomen or transmasculin* or transfeminin* or transpeople* or transperson* or crosssex* or crossgender* or (cross adj sex*) or (cross adj gender*)).ti,ab,kf                                                                                                                                                                                                                                                                                                                                                                                                                                                                                                                                                                                                                                                                                                                                                                                                                                                                                                                                                                                                                                                                                                                                                                                                                                                                                                           | 9472    |
| (trans adj5 (gender* or sex* or man or men or woman or women or mascul* or feminin* or people* or person* or male* or female* or individual* or identi* or inclus* or queer* or glbt* or lgbt* or cis or cisgender*)).ti,ab,kf                                                                                                                                                                                                                                                                                                                                                                                                                                                                                                                                                                                                                                                                                                                                                                                                                                                                                                                                                                                                                                                                                                                                                                                                                                                                                                                   | 25718   |
| or/1-4                                                                                                                                                                                                                                                                                                                                                                                                                                                                                                                                                                                                                                                                                                                                                                                                                                                                                                                                                                                                                                                                                                                                                                                                                                                                                                                                                                                                                                                                                                                                           | 36478   |
| sex reassignment procedures/ or gender dysphoria/dt or transgender persons/dt or transsexualism/dt                                                                                                                                                                                                                                                                                                                                                                                                                                                                                                                                                                                                                                                                                                                                                                                                                                                                                                                                                                                                                                                                                                                                                                                                                                                                                                                                                                                                                                               | 653     |
| exp hormone replacement therapy/ or feminization/ or exp virilism/ or ((exp gonadal hormones/ or exp hormone antagonists/ or exp pregnanes/ or exp norpregnanes/ or exp gonadotropin-releasing hormone/ or exp azasteroids/ or flutamide/ or letrozole/ or anastrozole/ or exp tamoxifen/ or exp androstanols/) and (tu.fs or th.fs))                                                                                                                                                                                                                                                                                                                                                                                                                                                                                                                                                                                                                                                                                                                                                                                                                                                                                                                                                                                                                                                                                                                                                                                                            | 229160  |
| ((gender* or sex* or crosssex* or crossgender* or affirming or affirmat* or confirming or confirmat* or masculini* or femini* or demasculini* or defemini* or viriliz* or virilis*) adj2 (hormon* or steroid* or treatment or therap* or medicat* or drug*)).ti,ab,kf                                                                                                                                                                                                                                                                                                                                                                                                                                                                                                                                                                                                                                                                                                                                                                                                                                                                                                                                                                                                                                                                                                                                                                                                                                                                            | 51850   |
| (hormon* or steroid* or abiraterone or aldactone or alora or anastrozole or andractim or andriol or androcur or androderm or androgel or androgen* or androstanolone or antiandrogen* or antiestrogen* or antigonadotropin* or antioestrogen* or arimidex or (aromatase adj2 inhibit*) or axiron or aveed or bazedoxifene or bicalutamide or casodex or chlormadinone or cma or cpa or cyclomen or cyproterone* or danatrol or danazant or danazol or danocrine or delatestryl or delestrogen or desogestrel or dihydrotestosterone or divigel or drospirenone or duavee or duphaston or dutasteride or dydrogesterone or elestrin or elleste or enantone or enzalutamide or equilin or equilenin or estertril or estrace or estradiol* or estroderm or estrofem or estrogen* or estrostep or estrone or ethinylestradiol or etonogestrel or evista or fareston or femara or finasteride or flutamide or galeterone or gestagen* or gestodene or gestogen* or gnhr or goserelin or gynorelle or histrelin or hrt or hydroxyprogesterone or jatenzo or keoxifene or letrozole or leuprolide or leuprorelin or levonorgestrel or lupron or luteran or lynestrenol or medrogestone or medroxyprogesterone or megestrol or mestranol or methandriol or methylandrostenediol or nafarelin or nandrolone or nilutamide or nolvadex or nomegestrol or norethindrone or norethisterone or norgestimate or norgestrel or oestradiol* or oestrogen* or oxandrolone or premarin or primolut or progesteron* or progestagen* or progestogen* or progynova or | 1015632 |

|                                                                                                                                                                                                                                                                                                                                                           |         |
|-----------------------------------------------------------------------------------------------------------------------------------------------------------------------------------------------------------------------------------------------------------------------------------------------------------------------------------------------------------|---------|
| promegestone or prometrium or proscar or prostal or provera or raloxifene or (reductase adj2 inhibit*) or serm or serms or spiractin or spironolacton* or stanolone or striant or supprelin or sustanon or synarel* or tamoxifen or testopel or testosterone* or toremifene or triptorelin or vantas or vivelle or xtandi or xyosted or zoladex).ti,ab,kf |         |
| or/6-9                                                                                                                                                                                                                                                                                                                                                    | 1162306 |
| 5 and 10                                                                                                                                                                                                                                                                                                                                                  | 3279    |
| exp animals/ not humans.sh                                                                                                                                                                                                                                                                                                                                | 4734591 |
| (adolescent/ or exp child/ or exp infant/) not exp adult/                                                                                                                                                                                                                                                                                                 | 1885861 |
| (comment or editorial or interview or news or newspaper article).pt                                                                                                                                                                                                                                                                                       | 1474057 |
| 11 not (12 or 13 or 14)                                                                                                                                                                                                                                                                                                                                   | 2678    |

## Embase

|                                                                                                                                                                                                                                                                                                                                                                                 |        |
|---------------------------------------------------------------------------------------------------------------------------------------------------------------------------------------------------------------------------------------------------------------------------------------------------------------------------------------------------------------------------------|--------|
| exp gender dysphoria/ or transsexuality/ or exp transgender/                                                                                                                                                                                                                                                                                                                    | 11347  |
| ((gender* or sex*) adj2 (dysphori* or identity disorder*)).ti,ab,kw                                                                                                                                                                                                                                                                                                             | 2491   |
| (transgender* or transsexual* or transman or transmen or transwoman or transwomen or transmasculin* or transfeminin* or transpeople* or transperson* or crosssex* or crossgender* or (cross adj sex*) or (cross adj gender*)).ti,ab,kw                                                                                                                                          | 12120  |
| (trans adj5 (gender* or sex* or man or men or woman or women or mascul* or feminin* or people* or person* or male* or female* or individual* or identi* or inclus* or queer* or glbt* or lgbt* or cis or cisgender*)).ti,ab,kw                                                                                                                                                  | 28398  |
| or/1-4                                                                                                                                                                                                                                                                                                                                                                          | 42446  |
| sex reassignment procedures/ or exp gender dysphoria/dt                                                                                                                                                                                                                                                                                                                         | 1333   |
| exp hormonal therapy/ or feminization/ or virilization/ or ((exp sex hormone/ or exp sex hormone antagonist/ or pregnane derivative/ or exp gonadorelin derivative/ or azasteroid/ or exp aromatase inhibitor/ or androstane derivative/ or gonadotropin antagonist/ or exp steroid 5alpha reductase inhibitor/ or exp hormone receptor affecting agent/) and (tu.fs or th.fs)) | 330045 |
| ((gender* or sex* or crosssex* or crossgender* or affirming or affirmat* or confirming or confirmat* or masculini* or femini* or demasculini* or defemini* or viriliz* or virilis*) adj2 (hormon* or steroid* or treatment or therap* or medicat* or drug*)).ti,ab,kw                                                                                                           | 67652  |

|                                                                                                                                                                                                                                                                                                                                                                                                                                                                                                                                                                                                                                                                                                                                                                                                                                                                                                                                                                                                                                                                                                                                                                                                                                                                                                                                                                                                                                                                                                                                                                                                                                                                                                                                                                                                                                                                                                                       |         |
|-----------------------------------------------------------------------------------------------------------------------------------------------------------------------------------------------------------------------------------------------------------------------------------------------------------------------------------------------------------------------------------------------------------------------------------------------------------------------------------------------------------------------------------------------------------------------------------------------------------------------------------------------------------------------------------------------------------------------------------------------------------------------------------------------------------------------------------------------------------------------------------------------------------------------------------------------------------------------------------------------------------------------------------------------------------------------------------------------------------------------------------------------------------------------------------------------------------------------------------------------------------------------------------------------------------------------------------------------------------------------------------------------------------------------------------------------------------------------------------------------------------------------------------------------------------------------------------------------------------------------------------------------------------------------------------------------------------------------------------------------------------------------------------------------------------------------------------------------------------------------------------------------------------------------|---------|
| (hormon* or steroid* or abiraterone or aldactone or alora or anastrozole or andractim or andriol or androcur or androderm or androgel or androgen* or androstanolone or antiandrogen* or antiestrogen* or antigonadotropin* or antioestrogen* or arimidex or (aromatase adj2 inhibit*) or axiron or aveed or bazedoxifene or bicalutamide or casodex or chlormadinone or cma or cpa or cyclomen or cyproterone* or danatrol or danazant or danazol or danocrine or delatestryl or delestrogen or desogestrel or dihydrotestosterone or divigel or drospirenone or duavee or duphaston or dutasteride or dydrogesterone or elestrin or elleste or enantone or enzalutamide or equilin or equilenin or esterrol or estrace or estradiol* or estroderm or estrofem or estrogel or estrogen* or estrostep or estrone or ethinylestradiol or etonogestrel or evista or fareston or femara or finasteride or flutamide or galeterone or gestagen* or gestodene or gestogen* or gnhr or goserelin or gynorelle or histrelin or hrt or hydroxyprogesterone or jatenzo or keoxifene or letrozole or leuprolide or leuprorelin or levonorgestrel or lupron or luteran or lynestrenol or medrogestone or medroxyprogesterone or megestrol or mestranol or methandriol or methylandrostenediol or nafarelin or nandrolone or nilutamide or nolvadex or nomegestrol or norethindrone or norethisterone or norgestimate or norgestrel or oestradiol* or oestrogen* or oxandrolone or premarin or primolut or progesteron* or progestagen* or progestogen* or progynova or promegestone or prometrium or proscar or prostal or provera or raloxifene or (reductase adj2 inhibit*) or serm or serms or spiractin or spironolacton* or stanolone or striant or supprelin or sustanon or synarel* or tamoxifen or testopel or testosterone* or toremifene or triptorelin or vantas or vivelle or xtandi or xyosted or zoladex).ti,ab,kw | 1270336 |
| or/6-9                                                                                                                                                                                                                                                                                                                                                                                                                                                                                                                                                                                                                                                                                                                                                                                                                                                                                                                                                                                                                                                                                                                                                                                                                                                                                                                                                                                                                                                                                                                                                                                                                                                                                                                                                                                                                                                                                                                | 1468207 |
| 5 and 10                                                                                                                                                                                                                                                                                                                                                                                                                                                                                                                                                                                                                                                                                                                                                                                                                                                                                                                                                                                                                                                                                                                                                                                                                                                                                                                                                                                                                                                                                                                                                                                                                                                                                                                                                                                                                                                                                                              | 5178    |
| (exp animal/ or nonhuman/) not exp human/                                                                                                                                                                                                                                                                                                                                                                                                                                                                                                                                                                                                                                                                                                                                                                                                                                                                                                                                                                                                                                                                                                                                                                                                                                                                                                                                                                                                                                                                                                                                                                                                                                                                                                                                                                                                                                                                             | 6432158 |
| (exp adolescent/ or exp child/) not exp adult/                                                                                                                                                                                                                                                                                                                                                                                                                                                                                                                                                                                                                                                                                                                                                                                                                                                                                                                                                                                                                                                                                                                                                                                                                                                                                                                                                                                                                                                                                                                                                                                                                                                                                                                                                                                                                                                                        | 2149735 |
| (editorial or note).pt                                                                                                                                                                                                                                                                                                                                                                                                                                                                                                                                                                                                                                                                                                                                                                                                                                                                                                                                                                                                                                                                                                                                                                                                                                                                                                                                                                                                                                                                                                                                                                                                                                                                                                                                                                                                                                                                                                | 1478283 |
| 11 not (12 or 13 or 14)                                                                                                                                                                                                                                                                                                                                                                                                                                                                                                                                                                                                                                                                                                                                                                                                                                                                                                                                                                                                                                                                                                                                                                                                                                                                                                                                                                                                                                                                                                                                                                                                                                                                                                                                                                                                                                                                                               | 4167    |

## Cochrane

|                                                                                                                                                                                                                                        |     |
|----------------------------------------------------------------------------------------------------------------------------------------------------------------------------------------------------------------------------------------|-----|
| gender dysphoria/ or transgender persons/ or "health services for transgender persons"/ or transsexualism/                                                                                                                             | 65  |
| ((gender* or sex*) adj2 (dysphori* or identity disorder*)).ti,ab,hw                                                                                                                                                                    | 29  |
| (transgender* or transsexual* or transman or transmen or transwoman or transwomen or transmasculin* or transfeminin* or transpeople* or transperson* or crosssex* or crossgender* or (cross adj sex*) or (cross adj gender*)).ti,ab,hw | 339 |

|                                                                                                                                                                                                                                                                                                                                                                                                                                                                                                                                                                                                                                                                                                                                                                                                                                                                                                                                                                                                                                                                                                                                                                                                                                                                                                                                                                                                                                                                                                                                                                                                                                                                                                                                                                                                                                                                                                                       |        |
|-----------------------------------------------------------------------------------------------------------------------------------------------------------------------------------------------------------------------------------------------------------------------------------------------------------------------------------------------------------------------------------------------------------------------------------------------------------------------------------------------------------------------------------------------------------------------------------------------------------------------------------------------------------------------------------------------------------------------------------------------------------------------------------------------------------------------------------------------------------------------------------------------------------------------------------------------------------------------------------------------------------------------------------------------------------------------------------------------------------------------------------------------------------------------------------------------------------------------------------------------------------------------------------------------------------------------------------------------------------------------------------------------------------------------------------------------------------------------------------------------------------------------------------------------------------------------------------------------------------------------------------------------------------------------------------------------------------------------------------------------------------------------------------------------------------------------------------------------------------------------------------------------------------------------|--------|
| (trans adj5 (gender* or sex* or man or men or woman or women or mascul* or feminin* or people* or person* or male* or female* or individual* or identi* or inclus* or queer* or glbt* or lgbt* or cis or cisgender*)).ti,ab,hw                                                                                                                                                                                                                                                                                                                                                                                                                                                                                                                                                                                                                                                                                                                                                                                                                                                                                                                                                                                                                                                                                                                                                                                                                                                                                                                                                                                                                                                                                                                                                                                                                                                                                        | 445    |
| or/1-4                                                                                                                                                                                                                                                                                                                                                                                                                                                                                                                                                                                                                                                                                                                                                                                                                                                                                                                                                                                                                                                                                                                                                                                                                                                                                                                                                                                                                                                                                                                                                                                                                                                                                                                                                                                                                                                                                                                | 768    |
| sex reassignment procedures/ or gender dysphoria/dt or transgender persons/dt or transsexualism/dt                                                                                                                                                                                                                                                                                                                                                                                                                                                                                                                                                                                                                                                                                                                                                                                                                                                                                                                                                                                                                                                                                                                                                                                                                                                                                                                                                                                                                                                                                                                                                                                                                                                                                                                                                                                                                    | 4      |
| exp hormone replacement therapy/ or feminization/ or exp virilism/ or ((exp gonadal hormones/ or exp hormone antagonists/ or exp pregnanes/ or exp norpregnanes/ or exp gonadotropin-releasing hormone/ or exp azasteroids/ or flutamide/ or letrozole/ or anastrozole/ or exp tamoxifen/ or exp androstanols/) and (tu.fs or th.fs))                                                                                                                                                                                                                                                                                                                                                                                                                                                                                                                                                                                                                                                                                                                                                                                                                                                                                                                                                                                                                                                                                                                                                                                                                                                                                                                                                                                                                                                                                                                                                                                 | 22828  |
| ((gender* or sex* or crosssex* or crossgender* or affirming or affirmat* or confirming or confirmat* or masculini* or femini* or demasculini* or defemini* or viriliz* or virilis*) adj2 (hormon* or steroid* or treatment or therap* or medicat* or drug*)).ti,ab,hw                                                                                                                                                                                                                                                                                                                                                                                                                                                                                                                                                                                                                                                                                                                                                                                                                                                                                                                                                                                                                                                                                                                                                                                                                                                                                                                                                                                                                                                                                                                                                                                                                                                 | 9651   |
| (hormon* or steroid* or abiraterone or aldactone or alora or anastrozole or andractim or andriol or androcur or androderm or androgel or androgen* or androstanolone or antiandrogen* or antiestrogen* or antigonadotropin* or antioestrogen* or arimidex or (aromatase adj2 inhibit*) or axiron or aveed or bazedoxifene or bicalutamide or casodex or chlormadinone or cma or cpa or cyclomen or cyproterone* or danatrol or danazant or danazol or danocrine or delatestryl or delestrogen or desogestrel or dihydrotestosterone or divigel or drospirenone or duavee or duphaston or dutasteride or dydrogesterone or elestrin or elleste or enantone or enzalutamide or equilin or equilenin or esterrol or estrace or estradiol* or estroderm or estrofem or estrogel or estrogen* or estrostep or estrone or ethinylestradiol or etonogestrel or evista or fareston or femara or finasteride or flutamide or galeterone or gestagen* or gestodene or gestogen* or gnhr or goserelin or gynorelle or histrelin or hrt or hydroxyprogesterone or jatenzo or keoxifene or letrozole or leuprolide or leuprorelin or levonorgestrel or lupron or luteran or lynestrenol or medrogestone or medroxyprogesterone or megestrol or mestranol or methandriol or methylandrostenediol or nafarelin or nandrolone or nilutamide or nolvadex or nomegestrol or norethindrone or norethisterone or norgestimate or norgestrel or oestradiol* or oestrogen* or oxandrolone or premarin or primolut or progesteron* or progestagen* or progestogen* or progynova or promegestone or prometrium or proscar or prostal or provera or raloxifene or (reductase adj2 inhibit*) or serm or serms or spiractin or spironolacton* or stanolone or striant or supprelin or sustanon or synarel* or tamoxifen or testopel or testosterone* or toremifene or triptorelin or vantas or vivelle or xtandi or xyosted or zoladex).ti,ab,hw | 116351 |
| or/6-9                                                                                                                                                                                                                                                                                                                                                                                                                                                                                                                                                                                                                                                                                                                                                                                                                                                                                                                                                                                                                                                                                                                                                                                                                                                                                                                                                                                                                                                                                                                                                                                                                                                                                                                                                                                                                                                                                                                | 131010 |
| 5 and 10                                                                                                                                                                                                                                                                                                                                                                                                                                                                                                                                                                                                                                                                                                                                                                                                                                                                                                                                                                                                                                                                                                                                                                                                                                                                                                                                                                                                                                                                                                                                                                                                                                                                                                                                                                                                                                                                                                              | 94     |
| exp animals/ not humans.sh                                                                                                                                                                                                                                                                                                                                                                                                                                                                                                                                                                                                                                                                                                                                                                                                                                                                                                                                                                                                                                                                                                                                                                                                                                                                                                                                                                                                                                                                                                                                                                                                                                                                                                                                                                                                                                                                                            | 12     |
| (adolescent/ or exp child/ or exp infant/) not exp adult/                                                                                                                                                                                                                                                                                                                                                                                                                                                                                                                                                                                                                                                                                                                                                                                                                                                                                                                                                                                                                                                                                                                                                                                                                                                                                                                                                                                                                                                                                                                                                                                                                                                                                                                                                                                                                                                             | 57327  |

11 not (12 or 13) 94

### **Clinicaltrials.gov**

hormone OR "hormonal therapy" OR steroid OR abiraterone OR aldactone OR alora OR anastrozole OR andractim OR andriol OR androcur OR androderm OR androgel | transgender OR trans OR "gender dysphoria" OR "gender identity" 78

androgen OR androstanolone OR antiandrogen OR antiestrogen OR antigonadotropin OR antioestrogen OR arimidex OR "aromatase inhibitor" OR axiron OR aveed | transgender OR trans OR "gender dysphoria" OR "gender identity" 18

bazedoxifene OR bicalutamide OR casodex OR chlormadinone OR cma OR cpa OR cyclomen OR cyproterone OR danatrol OR danazant OR danazol OR danocrine | transgender OR trans OR "gender dysphoria" OR "gender identity" 5

delatestryl OR delestrogen OR desogestrel OR dihydrotestosterone OR divigel OR drospirenone OR duavee OR duphaston OR dutasteride OR dydrogesterone | transgender OR trans OR "gender dysphoria" OR "gender identity" 27

elestrin OR elleste OR enantone OR enzalutamide OR equilin OR equilenin OR esterol OR estrace OR estradiol OR estroderm OR estrofem OR estrogel | transgender OR trans OR "gender dysphoria" OR "gender identity" 28

estrogen OR estrostep OR estrone OR ethinylestradiol OR etonogestrel OR evista OR fareston OR femara OR finasteride OR flutamide | transgender OR trans OR "gender dysphoria" OR "gender identity" 18

galeterone OR gestagen OR gestodene OR gestogen OR gnhr OR goserelin OR gynorelle OR histrelin OR hrt OR hydroxyprogesterone OR jatenzo OR keoxifene | transgender OR trans OR "gender dysphoria" OR "gender identity" 17

letrozole OR leuprolide OR leuprorelin OR levonorgestrel OR lupron OR luteran OR lynestrenol OR medrogestone OR medroxyprogesterone OR megestrol OR mestranol OR methandriol OR methylandrostenediol | transgender OR trans OR "gender dysphoria" OR "gender identity" 7

nafarelin OR nandrolone OR nilutamide OR nolvadex OR nomegestrol OR norethindrone OR norethisterone OR norgestimate OR norgestrel OR oestradiol OR oestrogen OR oxandrolone | transgender OR trans OR "gender dysphoria" OR "gender identity" 34

premarin OR primolut OR progesteron OR progestagen OR progestogen OR progynova OR promegestone OR prometrium OR proscar OR prosta OR provera OR raloxifene OR "reductase inhibitor" | transgender OR trans OR "gender dysphoria" OR "gender identity" 28

serm OR serms OR spiractin OR spironolacton OR stanolone OR striant OR supprelin OR sustanon OR synarel | transgender OR trans OR "gender dysphoria" OR "gender identity" 12

tamoxifen OR testopel OR testosterone OR toremifene OR triptorelin OR vantas OR vivelle OR xtandi OR xyosted OR zoladex | transgender OR trans OR "gender dysphoria" OR "gender identity"

43

Total unique

88

**Supplemental Table 2:** Studies of transgender men on GAHT and creatinine at baseline and follow-up (n=18 studies)

| Study | Author (year)                           | Number of transgender men | GAHT type and dose                                                                                                                                                      | Age (years)                                                      | Creatinine ( $\mu\text{mol/L}$ )                                                                                       |
|-------|-----------------------------------------|---------------------------|-------------------------------------------------------------------------------------------------------------------------------------------------------------------------|------------------------------------------------------------------|------------------------------------------------------------------------------------------------------------------------|
| 1     | Becerra Fernandez <sup>41</sup><br>2016 | 26                        | 21 = testosterone esters (250 mg IM q1-2 weeks)<br>5 = TU 120-160 mg po daily                                                                                           | 30.2 (7.4)                                                       | <b>baseline</b><br>64.55 $\pm$ 2.65<br><b>3-6 months</b><br>76.93 $\pm$ 3.54<br><b>6-18 months</b><br>72.50 $\pm$ 3.54 |
| 2     | Bunck <sup>25</sup><br>2006             | 30                        | 16 = Testosterone esters (250mg IM q2-3weeks with non-steroidal aromatase inhibitor anastrozole (1 mg/day)<br>14 = Testosterone esters (250mg IM q2-3weeks with placebo | Placebo (n=14)<br>34.8 (8.3)<br>Anastrozole (n=16)<br>37.1 (7.0) | AI<br><b>baseline*</b><br>93.63 $\pm$ 10.42<br><b>3 months</b><br>95.19 $\pm$ 7.64                                     |
| 3     | Fernandez <sup>26</sup><br>1999         | 19                        | Testosterone IM injections (11mg/day) (calculated as injected dose/days between injections)<br>75% q2 weeks<br>25% <q2 weekly                                           | mean<br>27<br>range: 19-47                                       | <b>baseline*</b><br>91.07 (10.61)                                                                                      |
| 4     | Giltay <sup>27</sup><br>1998            | 17                        | Testosterone esters (250mg IM q2weeks)                                                                                                                                  | median 22<br>range: 16-34                                        | <b>baseline</b><br>77 $\pm$ 9<br><b>4 months</b> 85 $\pm$ 12                                                           |



|   |                              |     |                                                                                                                                                               |                                                                                      |                                                                                                                                                            |
|---|------------------------------|-----|---------------------------------------------------------------------------------------------------------------------------------------------------------------|--------------------------------------------------------------------------------------|------------------------------------------------------------------------------------------------------------------------------------------------------------|
| 5 | Giltay <sup>28</sup><br>2008 | 14  | Testosterone esters (250mg IM q2weeks)                                                                                                                        | mean<br>23.0 (4.2)                                                                   | <b>baseline</b><br>77±9<br><b>4 months</b> 85±13<br><b>12 months</b><br>91±11                                                                              |
| 6 | Humble <sup>29</sup><br>2019 | 150 | 133 = IM testosterone<br>3 = transdermal testosterone<br>14 = IM/transdermal testosterone<br>*Doses not reported                                              | mean<br>24.2 ± 6.3 years                                                             | <b>n=25</b><br><b>baseline</b><br>0.77±0.10<br><b>6 months</b><br>0.9±0.12<br><b>n=15</b><br><b>baseline</b><br>0.77±0.12<br><b>12 months</b><br>0.89±0.13 |
| 7 | Kurahashi <sup>32</sup>      | 160 | “low dose”<br>107= testosterone 125mg IM q2 weeks<br>“middle dose”<br>21= testosterone 250mg IM q3 weeks<br>“high dose”<br>32= testosterone 250mg IM q2 weeks | mean<br>“low dose” 24.9 ± 0.5,<br>“middle dose” 26.1 ± 1.2<br>“high dose” 28.1 ± 1.0 | <b>Not reported</b>                                                                                                                                        |

|    |                                       |                                  |                                                                                                                                                                                                                                                                                                                                                |                                                                         |                                                                                        |
|----|---------------------------------------|----------------------------------|------------------------------------------------------------------------------------------------------------------------------------------------------------------------------------------------------------------------------------------------------------------------------------------------------------------------------------------------|-------------------------------------------------------------------------|----------------------------------------------------------------------------------------|
| 8  | Meriggiola <sup>33</sup><br>2018      | 15                               | <p>Prior to study: testoviron depot injections<br/>100mg/q7-15 days = testosterone enanthate 110 mg + testosterone propionate 25 mg.</p> <p>In study:</p> <p>a) TU (1000 mg IM)<br/>b) TU (1000 mg IM) +<br/>letrozole (2.5mg po daily)<br/>c) TU (1000 mg IM) +<br/>dutasteride (0.5mg po daily)</p> <p>Injections at 0,6,18,30, 42 weeks</p> | <p>mean</p> <p>a) 34.4 (4.39)<br/>b) 36.0 (4.58)<br/>c) 36.6 (5.86)</p> | <p>a) only<br/><b>baseline*</b><br/>87.54±14.15<br/><b>week 54</b><br/>90.19±13.26</p> |
| 9  | SoRelle <sup>36</sup><br>2019         | Baseline: 62<br>Post-GAHT:<br>89 | <p>87= testosterone cypionate<br/>35-300 mg IM q1-2 weeks<br/>1= transdermal testosterone<br/>1= both</p>                                                                                                                                                                                                                                      | <p>mean</p> <p>Baseline: 27 (9)<br/>Post-GAHT: 30 (9)</p>               | <p><b>baseline</b><br/>65.43<br/><b>GAHT (≥6<br/>months</b><br/>79.58</p>              |
| 10 | van<br>Caenegem <sup>44</sup><br>2012 | 50                               | <p>35 = testosterone esters 30-100mg IM q2-3weeks<br/>7 = TU 1000 mg IM q12 weeks<br/>8 = transdermal testosterone 50 mg daily<br/>1 = oral TU 40<br/>mg po daily and testosterone gel 50 mg daily</p>                                                                                                                                         | <p>mean</p> <p>26 (7)</p>                                               | <p><b>baseline*</b><br/>0.93 (0.13)</p>                                                |

|    |                                    |     |                                                                                                                                                                                                   |                             |                                                                                                                            |
|----|------------------------------------|-----|---------------------------------------------------------------------------------------------------------------------------------------------------------------------------------------------------|-----------------------------|----------------------------------------------------------------------------------------------------------------------------|
| 11 | van Kesteren <sup>37</sup><br>1998 | 19  | 12=testosterone esters 250mg IM q2-3 weeks<br>7=TU (160mg/daily)                                                                                                                                  | mean<br>25.0<br>range 16-39 | <b>baseline</b><br>72±8<br><b>12 months</b><br>79±9<br><b>25.2 ± 10.4</b><br><b>months after</b><br><b>surgery</b><br>85±6 |
| 12 | van Velzen <sup>17</sup><br>2019   | 188 | Ghent: TU 1000mg IM q12 weeks<br>Netherlands: testosterone gel 50mg/daily or<br>testosterone esters 250mg IM q2 weeks                                                                             | mean<br>26.4 (9.1)          | <b>baseline</b><br>67±10<br><b>12 months</b><br>17.65%<br>(15.0%, 20.3%)<br>78.79                                          |
| 13 | Vita <sup>38</sup><br>2018         | 11  | 10= testosterone enathate IM q2-4 weeks<br>1 = TU IM q2-4 weeks<br>*No dose reported                                                                                                              | mean<br>25.1 (3.7)          | <b>baseline</b><br>61.9±8.8 <b>follow-</b><br><b>up</b><br><b>(unspecified)</b><br>88.4±8.8                                |
| 14 | Vlot <sup>18</sup><br>2019         | 132 | testosterone gel 50mg topically daily<br>testosterone esters 250mg IM q2-3weeks TU<br>1000mg IM q12weeks<br>lynestrenol                                                                           | median<br>24 (21-33)        | <b>baseline</b><br>66±10<br><b>12 months</b><br>79±12                                                                      |
| 15 | Wierckx <sup>45</sup><br>2012      | 50  | 35= testosterone esters 250 mg IM q2-3 weeks<br>15= TU 1000 mg IM q12 weeks<br>7 = testosterone gel 50 mg topically daily<br>1 = TU 40mg po daily and = testosterone gel 50<br>mg topically daily | mean<br>37 (8.2)            | <b>baseline*</b><br>79.58<br>(79.58- 88.42)                                                                                |

|    |                                |     |                                                                                                                                                                                                                                            |                                                                   |                                                                                                           |
|----|--------------------------------|-----|--------------------------------------------------------------------------------------------------------------------------------------------------------------------------------------------------------------------------------------------|-------------------------------------------------------------------|-----------------------------------------------------------------------------------------------------------|
| 16 | Wierckx <sup>19</sup><br>2014  | 53  | TU 1000 mg IM at baseline, 6 weeks, q12 weeks<br>testosterone esters (30-100mg IM q2 weeks) if any<br>intolerance<br>Progestagens                                                                                                          | mean<br>Ghent (n=27):<br>27.3 (8.5)<br>Oslo (n=26):<br>21.7 (5.1) | <b>baseline</b><br>65.43±8.84<br><b>12 months</b><br>74.27±8.84                                           |
| 17 | Yahyaoui<br>2008 <sup>39</sup> | 47  | 1 <sup>st</sup> year<br>93.3% testosterone enanthate or propionate 250mg<br>IM q2 weeks<br>6.7% testosterone patch 5mg topically/day<br>2 <sup>nd</sup> year<br>69.6% testosterone enanthate or propionate<br>30.5% testosterone patch/gel | mean<br>25.7 (6.0)                                                | <b>baseline</b><br>68.97 (9.73)<br><b>12 months</b><br>80.46 (13.26)<br><b>24 months</b><br>78.69 (11.49) |
| 18 | Scharff<br>2019 <sup>46</sup>  | 278 | 52 testosterone gel 50 mg daily<br>130 testosterone esters 250 mg IM q2-3 weeks<br>81 testosterone undecanoate 1000 mg IM q12<br>weeks                                                                                                     | median (IQR)<br>23 (20-30)                                        | <b>baseline</b><br>66.0 (9.0)<br><b>12 months</b><br>77.4 (10.6)                                          |

Note: GAHT=gender-affirming hormone therapy, IM=intramuscular, testosterone undecanoate = TU

\*Indicates “baseline” at the start of study for patients already on GAHT

**Supplemental Table 3:** Studies of transgender women on GAHT and creatinine at baseline and follow-up (n=23 studies)

| Study | Author (year)                           | Number of transgender women | GAHT type and dose                                                                                                                                                                                     | Age (years)                 | Creatinine (µmol/L)                                                                               |
|-------|-----------------------------------------|-----------------------------|--------------------------------------------------------------------------------------------------------------------------------------------------------------------------------------------------------|-----------------------------|---------------------------------------------------------------------------------------------------|
| 1     | Angus <sup>40</sup><br>2019             | 80                          | 21 = estradiol alone, estradiol valerate (6mg (4,6))<br>21 = estradiol and CPA (50mg (25, 50))<br>38 = estradiol and spironolactone (100mg (87.5–200))                                                 | median<br>27 (22–45)        | <b>baseline*</b><br>estradiol alone 78 (72–96)<br>CPA 72 (63–75)<br>spironolactone 77 (69–85)     |
| 2     | Becerra Fernandez <sup>41</sup><br>2016 | 31                          | 27 = estrogen enanthate (100-200mg q monthly IM)<br>27 = progesterone (algestone) (150mg/10mg of estrogen q monthly IM)<br>27= CPA (200-400mg)<br>4 = other combinations                               | mean<br>30.2 (7.4)          | <b>baseline*</b><br>88.42 (15.92)                                                                 |
| 3     | Cottrell <sup>42</sup><br>2019          | 4                           | 4 = estrogen<br>1 = progesterone<br>4 = spironolactone<br>*Doses not reported                                                                                                                          | median<br>42 (34, 46)       | <b>Not reported</b>                                                                               |
| 4     | Fernandez <sup>26</sup><br>1999         | 33                          | Oral estrogen 18, 7 (1.44 mg/day, 1.71 mg/day)<br>Estrogen patch 7, 2 (0.1 mg/day, 0.1 mg/day)<br>Estrogen injection 7, 5 (1.21 mg/day, 1.18 mg/day)<br>Spironolactone 23, 14 (104 mg/day, 114 mg/day) | mean<br>31<br>range: 16-56  | <b>baseline</b><br>64.55±2.65<br><b>3-6 months</b><br>76.93±3.54<br><b>6-18 months</b><br>50±3.54 |
| 5     | Giltay <sup>27</sup><br>1998            | 17                          | ethinyl estradiol 100ug/day<br>CPA100mg/day                                                                                                                                                            | median<br>28<br>range 18–40 | <b>baseline</b><br>86±8<br><b>4 months</b><br>79±9                                                |

|    |                                     |     |                                                                                                                                                                                                                                |                        |                                                                                                                                                                                          |
|----|-------------------------------------|-----|--------------------------------------------------------------------------------------------------------------------------------------------------------------------------------------------------------------------------------|------------------------|------------------------------------------------------------------------------------------------------------------------------------------------------------------------------------------|
| 6  | Giltay <sup>28</sup><br>2008        | 15  | ethinyl estradiol 100ug/day<br>CPA 100mg/day                                                                                                                                                                                   | mean<br>26.3 (6.3)     | <b>baseline</b><br>84±8<br><b>4 months</b><br>77±10<br><b>12 months</b><br>76±8                                                                                                          |
| 7  | Hiransuthikul <sup>30</sup><br>2019 | 20  | E2 valerate 2mg/day<br>CPA 25mg/day                                                                                                                                                                                            | median<br>21.5 (21–26) | <b>Not reported</b>                                                                                                                                                                      |
| 8  | Humble <sup>29</sup><br>2019        | 152 | 58=oral estrogen<br>2=IM estrogen<br>43=transdermal estrogen<br>3=oral/IM estrogen<br>38=oral/transdermal estrogen<br>2=IM/transdermal estrogen<br>6=oral/IM/transdermal estrogen<br>144=spironolactone<br>*Doses not reported | mean<br>31.8 (12.5)    | <b>n= 66</b><br><b>baseline</b><br>0.92±0.14 mEq/L<br><b>6 months</b><br>0.91(±0.16) mEq/L<br><b>n = 49</b><br><b>baseline</b><br>0.93±0.15 mEq/L<br><b>12 months</b><br>0.89±0.15 mEq/L |
| 9  | Jain <sup>31</sup><br>2019          | 92  | 39 patients receiving MPA<br>53 patients not receiving MPA<br>sublingual E (2-12 mg daily)<br>spironolactone= 100-200 mg/daily)<br>MPA= 5-10mg sl daily/150 mg IM q3 months<br>Table 1 for estrogen doses                      | mean<br>31.0 (7.1)     | <b>baseline*</b><br>77.81±12.38<br><b>3 months</b><br>results varied by dose of<br>MPA                                                                                                   |
| 10 | Nicholls <sup>34</sup>              | 22  | 21= stilboestrol 5-40mg/day<br>1 = ethinylestradiol 0.4mg daily                                                                                                                                                                | range<br>19-55         | <b>Not reported</b>                                                                                                                                                                      |
| 11 | Roberts <sup>43</sup><br>2014       | 55  | Not reported                                                                                                                                                                                                                   | Not reported           | <b>baseline*</b><br>0.55-1.3                                                                                                                                                             |

|    |                                    |     |                                                                                                                                                                                                        |                          |                                                                                                         |
|----|------------------------------------|-----|--------------------------------------------------------------------------------------------------------------------------------------------------------------------------------------------------------|--------------------------|---------------------------------------------------------------------------------------------------------|
| 12 | Shieh <sup>35</sup><br>2019        | 8   | 3 estradiol (oral) (2-6mg daily)<br>5 estradiol valerate (IM)<br>(0.5-40mg IM q 1-2 weeks)<br>3 premarin (1.25-6.25mg daily)<br>6 spironolactone (50-200mg daily)<br>1 medroxyprogesterone (5mg daily) | median<br>29 (26, 41)    | <b>baseline</b><br>not reported<br><b>Day 7</b><br>0.80 (0.80, 0.88)                                    |
| 13 | SoRelle <sup>36</sup><br>2019      | 133 | 112 oral estradiol<br>12 estradiol valerate<br>3 transdermal estradiol<br>6 other estrogens<br>107 spironolactone<br>1 CPA<br>Doses in supplemental Table 1                                            | mean<br>33               | <b>baseline</b><br>86.65<br><b>GAHT ≥6 months</b><br>76.04                                              |
| 14 | van Kesteren <sup>37</sup><br>1998 | 20  | CPA (100mg/daily)<br>ethinyl oestradiol (100 mcg/daily)<br>after surgery:<br>15=ethinyl oestradiol 1-2 50mcg per day<br>4=conjugated estrogens<br>1=transdermal oestradiol                             | mean 25.4                | <b>baseline</b><br>81±7<br><b>12 months</b><br>77±7<br><b>25.2 ± 10.4 months after surgery</b><br>78 ±7 |
| 15 | van Velzen <sup>17</sup><br>2019   | 242 | CPA 50mg/daily<br>144: estradiol valerate 2 mg/ 2x day if <45 years<br>98: estradiol patches 100ug/24hrs if >45 years                                                                                  | mean (SD)<br>32.3 (12.6) | <b>baseline</b><br>77±10<br><b>12 months</b><br>5.3%,<br>(-6.5, -4.1 change) 72.92                      |
| 16 | Vita <sup>38</sup><br>2018         | 21  | oral estradiol (estradiol valerate (2-6mg/d),<br>CPA (50-100 mg/d)<br>progesterone<br>Only estradiol after sex reassignment surgery                                                                    | mean<br>25.2 (7.0)       | <b>baseline</b><br>70.7±8.8<br><b>follow-up (unspecified)</b><br>70.7±8.8                               |

|    |                                |     |                                                                                                                                                                         |                                                                      |                                                                                                                                                                                   |
|----|--------------------------------|-----|-------------------------------------------------------------------------------------------------------------------------------------------------------------------------|----------------------------------------------------------------------|-----------------------------------------------------------------------------------------------------------------------------------------------------------------------------------|
| 17 | Vlot <sup>18</sup><br>2019     | 121 | CPA (50-100mg/daily)<br>estradiol valerate (2-4mg/daily)<br>estradiol patches (50-100ug/24hours 2x/week)                                                                | median<br>24 (IQR 21-33)                                             | <b>baseline</b><br>77±10<br><b>12 months</b><br>73±10                                                                                                                             |
| 18 | Wierckx <sup>45</sup><br>2012  | 50  | CPA 50-100mg/daily<br>22=transdermal estradiol 1.5mg/day<br>3=estradiol patch 50mcg/day<br>19=estradiol valerate 2mg daily<br>1=estriol 2mg daily                       | mean<br>43.0 (10.4)                                                  | <b>baseline*</b><br>70.74<br>(61.89 - 79.58)<br><b>N/A</b>                                                                                                                        |
| 19 | Wierckx <sup>19</sup><br>2014  | 53  | N=40 (<45 years)<br>CPA (50mg/daily)<br>estradiol valerate (4mg/daily)<br>N=13 (>45 years)<br>CPA (50mg/daily)<br>transdermal 17-B estradiol patch<br>(100mcg/24 hours) | Ghent (n=47)<br>mean 31.7 (14.8)<br>Oslo (n=6)<br>mean 19.3<br>(2.4) | a) Oral Estrogen<br><b>baseline</b><br>79.58±8.84<br><b>12 months</b><br>70.74±8.84<br>b) Transdermal estrogen<br><b>baseline</b><br>82.23±8.84<br><b>12 months</b><br>75.16±8.84 |
| 20 | Yahyaoui <sup>39</sup><br>2008 | 22  | CPA 50-100mg<br>18 conjugated oral estrogens<br>1 oral estradiol valerate<br>3 transdermal estradiol patches<br>16 low, 6 medium, 0 high doses respectively             | mean<br>23.1 (9.4)                                                   | <b>baseline</b><br>79.58 (15.03)<br><b>12 months</b><br>74.27 (18.57)<br><b>24 months</b><br>68.97 (18.57)                                                                        |
| 22 | Scharff<br>2019 <sup>46</sup>  | 249 | CPA 50mg daily<br>134=2-4 mg oral estradiol valerate a day<br>86=100 µg/24 h estradiol patch twice a week                                                               | median (IQR)<br>28 (23-40)                                           | <b>baseline</b><br>78.5 (10.8)<br><b>12 months</b><br>73.1 (10.6)                                                                                                                 |



|    |                              |    |                                                                                                                               |                                                                                                |                                                                                                                                                                             |
|----|------------------------------|----|-------------------------------------------------------------------------------------------------------------------------------|------------------------------------------------------------------------------------------------|-----------------------------------------------------------------------------------------------------------------------------------------------------------------------------|
| 23 | Giltay<br>2003 <sup>47</sup> | 40 | 10=CPA 100 mg/day<br>15 =CPA 100 mg/day + oral ethinyl estradiol 100 mg/day<br>15 =CPA 100 mg/day + transdermal 17b-estradiol | mean 34 years,<br>range 19-50<br>mean 33 years,<br>range 20-43<br>age 31 years,<br>range 20-44 | <b>Baseline</b><br>90 (11)<br><b>2 months</b><br>91 (8)<br><b>4 months</b><br>87 (8)<br><b>Baseline</b><br>89 (9)<br><b>2 months</b><br>86 (9)<br><b>4 months</b><br>87 (8) |
|----|------------------------------|----|-------------------------------------------------------------------------------------------------------------------------------|------------------------------------------------------------------------------------------------|-----------------------------------------------------------------------------------------------------------------------------------------------------------------------------|

Note: GAHT=gender-affirming hormone therapy, CPA=cyproterone acetate, MPA = medroxyprogesterone acetate

\*Indicates “baseline” at the start of study for patients already on GAHT

|                                                                    | Fernandez | Giltay 1998 | Giltay* 2003 | Humble | Scharff | Sorelle | van Kesteren | Vita | Yahyaoui |
|--------------------------------------------------------------------|-----------|-------------|--------------|--------|---------|---------|--------------|------|----------|
| 1. Study question                                                  |           |             |              |        |         |         |              |      |          |
| 2. Eligibility criteria and study population                       |           |             |              |        |         |         |              |      |          |
| 3. Generalizability                                                |           |             |              |        |         |         |              |      |          |
| 4. All eligible participants enrolled                              |           |             |              |        |         |         |              |      |          |
| 5. Sample size                                                     |           |             |              |        |         |         |              |      |          |
| 6. Intervention clearly described                                  |           |             |              |        |         |         |              |      |          |
| 7. Outcome measures clearly described, valid and reliable          |           |             |              |        |         |         |              |      |          |
| 8. Blinding of outcome assessors                                   |           |             |              |        |         |         |              |      |          |
| 9. Follow-up rate                                                  |           |             |              |        |         |         |              |      |          |
| 10. Statistical analysis                                           |           |             |              |        |         |         |              |      |          |
| 11. Multiple outcome measures                                      |           |             |              |        |         |         |              |      |          |
| 12. Group-level interventions and individual-level outcome efforts | NA        | NA          | NA           | NA     | NA      | NA      | NA           | NA   | NA       |
| Quality rating                                                     | Fair      | Fair        | Fair         | Fair   | Fair    | Fair    | Poor         | Poor | Fair     |

**Supplemental Figure 1:** Quality assessment

Note: \*randomized controlled trial, NA= not applicable

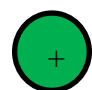

Low risk of bias

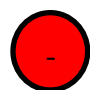

High risk of bias

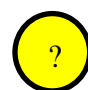

Cannot determine/  
Not reported

**Supplemental Table 4: Characteristics of creatinine assays of studies included in meta-analysis**

| Study | Author (year)                     | Creatinine assay                                                              |
|-------|-----------------------------------|-------------------------------------------------------------------------------|
| 1     | Fernandez <sup>26</sup> (2016)    | Not reported                                                                  |
| 2     | Giltay <sup>46</sup> (2003)       | Not reported                                                                  |
| 3     | Giltay <sup>27</sup> (1998)       | Not reported                                                                  |
| 4     | Humble <sup>29</sup> (2019)       | Roche Modular P<br>Roche Modular E170<br>Cobas 8000 system (c502, c602, e702) |
| 5     | SoRelle <sup>36</sup> (2019)      | Roche Cobas                                                                   |
| 6     | Scharff <sup>47</sup> (2019)      | Not reported                                                                  |
| 7     | van Kesteren <sup>37</sup> (1998) | Not reported                                                                  |
| 8     | Vita <sup>38</sup> (2018)         | Not reported                                                                  |
| 9     | Yahyaoui <sup>39</sup> (2008)     | Colorimetric enzymatic method                                                 |
